# Supplementary material
Source: PubMed Central journal article supplement (PMC5394947)
Supplement: 2016_160408-Disclosures_and_Contributions.pdf [file 2016_160408-Disclosures_and_Contributions.pdf]

Haematologica  
HAEMATOL/2016/160408  
Version 3

Deep and sustained response after venetoclax therapy in a patient with very advanced refractory myeloma with translocation t(11;14)

Cyrille Touzeau, Steven Le Gouill, Béatrice Mahé, Jean-Samuel Boudreault, Thomas Gastinne, Nicolas Blin, Hélène Caillon, Christelle Dousset, Martine Amiot, and Philippe Moreau

Disclosures: none

Contributions: CT, MA and PM wrote the manuscript. CD and MA performed in vitro experiments. CT, SLG, BM, TG, NB, JSB treated the patient. HC analyzed response. All the authors critically reviewed the manuscript.
